# Supplementary material for: Evidence of surfactant sub-monolayer adsorption at the air/water interface provided by laser scattering measurements of ultrafine gas bubbles
Source: Royal Society of Chemistry journal article supplement (doi:10.1039/d1nj02802b), 2021-01-01
Supplement: d1nj02802b1.pdf [file d1nj02802b1.pdf]

# EVIDENCE OF SURFACTANT SUB-MONOLAYER ADSORPTION AT THE AIR/WATER INTERFACE PROVIDED BY LASER SCATTERING MEASUREMENTS OF ULTRAFINE GAS BUBBLES

## SUPPLEMENTARY MATERIAL

Figure

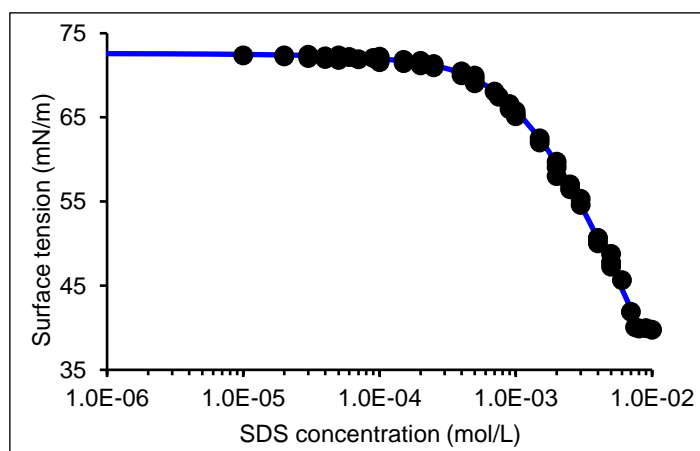

**Figure S1.** SDS isotherm in neat water at 25°C. Surface tension measurements were carried out by Wilhelmy plate method.

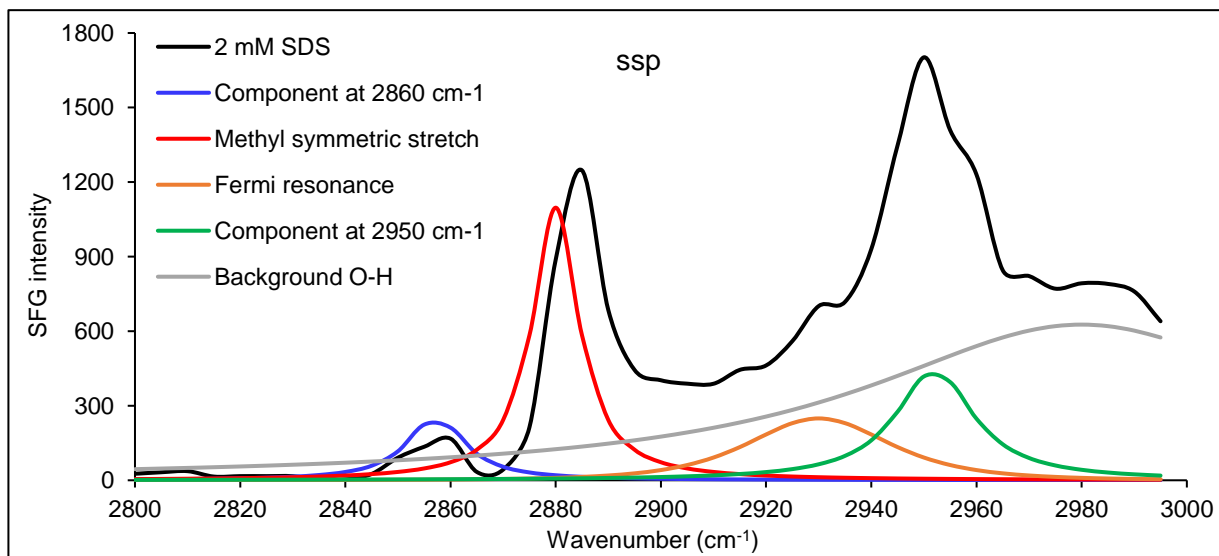

**Figure S2.** Detailed fitting of an SFG ssp C-H signal of the SDS adsorption layer at 2 mM SDS in neat water following the model in Equation 5. The Fermi resonance signal at 2935 cm<sup>-1</sup> was magnified by 500 times for better visualization.

**Table**

**Table S1.** A/T ratio of peaks obtained from SFG spectroscopy ppp and ssp C–H signal of neat water at various SDS concentrations. The results are expressed as means  $\pm$  standard deviations.

| Wavenumber (cm <sup>-1</sup> )                      |        | 2972 (ppp)     | 2876 (ssp)     |
|-----------------------------------------------------|--------|----------------|----------------|
| A/T ratio<br>(Amplitude<br>/damping<br>coefficient) | 2 mM   | 20.0 $\pm$ 0.3 | 35.6 $\pm$ 0.5 |
|                                                     | 5.7 mM | 21.6 $\pm$ 0.3 | 26.8 $\pm$ 0.4 |
|                                                     | 8.3 mM | 18.8 $\pm$ 0.3 | 22.7 $\pm$ 0.3 |
|                                                     | 20 mM  | 14.3 $\pm$ 0.2 | 22.6 $\pm$ 0.3 |
